# Supplementary material
Source: PubMed Central journal article supplement (PMC4825867)

**SUPPLEMENTAL DATA****Supplemental Figure Legend**

**Figure S1.** LC3B staining with brown chromogen in normal tissues from YTMA96 as follows: (a) normal brain tissue; (b) normal renal tubular epithelium; (c) an area in close proximity to ovarian carcinoma containing an LC3B-positive infiltrating macrophage ( $m\phi$ ) along with LC3B-negative lymphocytes (L); (d) breast carcinoma-infiltrating macrophage ( $m\phi$ ); (e) breast carcinoma-associated stromal fibroblasts; (f) melanoma-associated stromal fibroblasts abutting a primary invasive melanoma. Arrows denote LC3B punctate staining.

**Table S1:** Multitumor microarray YTMA96--LC3B staining intensity.

|                             | LC3B % moderate-strong staining<br>(Mean $\pm$ SD) | n = |
|-----------------------------|----------------------------------------------------|-----|
| Astrocytoma                 | 97 $\pm$ 7                                         | 11  |
| Hepatocellular carcinoma    | 96 $\pm$ 5                                         | 18  |
| Lymphoma non-Hodgkins       | 95 $\pm$ 10                                        | 10  |
| Prostate carcinoma          | 95 $\pm$ 11                                        | 19  |
| Gastric carcinoma           | 93 $\pm$ 6                                         | 14  |
| Glioblastoma                | 93 $\pm$ 5                                         | 11  |
| Ovarian carcinoma           | 93 $\pm$ 7                                         | 14  |
| Thyroid papillary carcinoma | 89 $\pm$ 11                                        | 12  |
| Lung carcinoma              | 87 $\pm$ 13                                        | 18  |
| Malignant melanoma          | 86 $\pm$ 18                                        | 20  |
| Endometrial carcinoma       | 85 $\pm$ 13                                        | 13  |
| Bladder carcinoma           | 84 $\pm$ 11                                        | 20  |
| Colon carcinoma             | 83 $\pm$ 8                                         | 14  |
| Sarcoma                     | 80 $\pm$ 11                                        | 16  |
| Squamous cell carcinoma     | 80 $\pm$ 7                                         | 15  |
| Pancreatic carcinoma        | 76 $\pm$ 19                                        | 11  |
| Breast carcinoma            | 72 $\pm$ 13                                        | 20  |
| Lymphoma Hodgkins           | 68 $\pm$ 24                                        | 10  |
| Renal cell carcinoma        | 63 $\pm$ 34                                        | 12  |
| Testis germ cell carcinoma  | 60 $\pm$ 12                                        | 14  |

Results represent the mean  $\pm$  SD of the percentage of tumors with moderate to strong staining intensities on multitumor microarray YTMA96. Tumors were scored on a 0-3<sup>+</sup> scale with 0/1+ = none to weak (not shown) and 2+/3+ = moderate to strong (shown above). Two slides of YTMA96 were stained with anti-LC3B using a brown chromogen. Both slides were scored independently by two observers and the were data combined such that the means represent a total of 4 data sets.

**Table S2:** Breast cancer array YTMA49--Clinicopathologic criteria vs LC3B staining intensity (AQUA score).

|                   | n   | LC3B mean $\pm$ std | p =      |
|-------------------|-----|---------------------|----------|
| Histologic Grade  |     |                     | 0.2034   |
| 1                 | 10  | 20.9 $\pm$ 7.4      |          |
| 2                 | 167 | 34.8 $\pm$ 25.9     |          |
| 3                 | 117 | 32.7 $\pm$ 23.5     |          |
| Nuclear Grade     |     |                     | < 0.0001 |
| 1                 | 95  | 17.9 $\pm$ 12.2     |          |
| 2                 | 292 | 24.8 $\pm$ 18.4     |          |
| 3                 | 156 | 40.0 $\pm$ 30.1     |          |
| Tumor Size        |     |                     | = 0.0117 |
| < 2 cm            | 187 | 23.4 $\pm$ 18.3     |          |
| 2-5 cm            | 259 | 28.9 $\pm$ 24.3     |          |
| $\geq$ 5 cm       | 88  | 31.1 $\pm$ 27.8     |          |
| Positive Nodes    |     |                     | < 0.0001 |
| 0 (node neg.)     | 286 | 21.2 $\pm$ 18.5     |          |
| 1-3               | 139 | 37.0 $\pm$ 27.9     |          |
| 4-9               | 92  | 30.4 $\pm$ 23.0     |          |
| $\geq$ 10         | 60  | 29.7 $\pm$ 17.2     |          |
| Patient Age       |     |                     | < 0.0001 |
| < 50 years        | 170 | 37.9 $\pm$ 46.4     |          |
| $\geq$ 50         | 425 | 26.8 $\pm$ 20.9     |          |
| Estrogen Receptor |     |                     | = 0.0009 |
| Negative          | 261 | 30.9 $\pm$ 26.2     |          |
| Positive          | 326 | 24.6 $\pm$ 18.9     |          |
| Prog. Receptor    |     |                     | = 0.0043 |
| Negative          | 267 | 30.3 $\pm$ 24.5     |          |
| Positive          | 320 | 24.9 $\pm$ 20.6     |          |
| HER2/neu          |     |                     | = 0.2943 |
| 0                 | 341 | 26.7 $\pm$ 21.7     |          |
| 1                 | 113 | 28.7 $\pm$ 24.7     |          |
| 2                 | 41  | 29.4 $\pm$ 25.7     |          |
| 3                 | 61  | 32.5 $\pm$ 22.9     |          |

**Table S3:** Breast cancer array YTMA49--Clinicopathologic criteria vs relative risk (univariate survival statistics).

|                   | Rel Risk | 95% C.I.      | p =        |
|-------------------|----------|---------------|------------|
| Histologic Grade  |          |               | 5142       |
| 1                 | 1.00     |               |            |
| 2                 | 1.15     | (0.505-2.632) |            |
| 3                 | 1.36     | (0.589-3.118) |            |
| Nuclear Grade     |          |               | p = 0.0064 |
| 1                 | 1.00     |               |            |
| 2                 | 1.10     | (0.789-1.540) |            |
| 3                 | 1.64     | (1.149-2.338) |            |
| Tumor Size        |          |               | p < 0.0001 |
| < 2 cm            | 1.00     |               |            |
| 2-5 cm            | 1.73     | (1.287-2.332) |            |
| ≥ 5 cm            | 2.93     | (2.082-4.134) |            |
| Positive Nodes    |          |               | p < 0.0001 |
| 0 (node neg)      | 1.00     |               |            |
| 1-3               | 1.96     | (1.460-2.633) |            |
| 4-9               | 2.37     | (1.705-3.300) |            |
| ≥10               | 3.22     | (2.243-4.055) |            |
| Patient Age       |          |               | p < 0.1215 |
| < 50 years        | 1.00     |               |            |
| ≥ 50              | 1.24     | (0.945-1.619) |            |
| Estrogen Receptor |          |               | p = 0.0032 |
| Positive          | 1.00     |               |            |
| Negative          | 1.43     | (1.126-1.805) |            |
| Prog. Receptor    |          |               | p = 0.0013 |
| Positive          | 1.00     |               |            |
| Negative          | 1.47     | (1.163-1.863) |            |
| HER2/neu          |          |               | p = 0.4339 |
| 0                 | 1.00     |               |            |
| 1                 | 0.98     | (0.719-1.345) |            |
| 2                 | 1.17     | (0.732-1.857) |            |
| 3                 | 1.19     | (0.794-1.714) |            |

**Table S4:** Melanoma microarray YTMA20--Clinicopathologic criteria vs LC3B staining intensity (AQUA score).

---

| <b>Primary tumors (invasive)</b> |    |                     |            |
|----------------------------------|----|---------------------|------------|
|                                  | n  | LC3B mean $\pm$ std | p =        |
| Breslow Depth                    |    |                     | 0.0479     |
| $\leq$ 1mm                       | 58 | 23.0 $\pm$ 13.8     |            |
| 1 – 2 mm                         | 48 | 21.0 $\pm$ 13.6     |            |
| 2 – 4 mm                         | 58 | 21.6 $\pm$ 18.7     |            |
| $>$ 4 mm                         | 44 | 32.6 $\pm$ 24.1     |            |
| Clark Level                      |    |                     | 0.1066     |
| II                               | 24 | 18.3 $\pm$ 13.5     |            |
| III                              | 70 | 21.2 $\pm$ 14.2     |            |
| IV                               | 84 | 24.0 $\pm$ 17.4     |            |
| V                                | 26 | 33.4 $\pm$ 28.9     |            |
| TILs                             |    |                     | 0.6681     |
| Absent                           | 10 | 19.8 $\pm$ 10.9     |            |
| Sparse                           | 25 | 22.0 $\pm$ 19.3     |            |
| NonBrisk                         | 65 | 25.9 $\pm$ 20.2     |            |
| Brisk                            | 29 | 23.1 $\pm$ 16.1     |            |
| Ulceration                       |    |                     | 0.1094     |
| Absent                           | 81 | 27.5 $\pm$ 14.9     |            |
| Present                          | 49 | 22.1 $\pm$ 23.0     |            |
| Sex                              |    |                     | 0.1973     |
| Male                             | 71 | 23.1 $\pm$ 15.3     |            |
| Female                           | 61 | 23.8 $\pm$ 19.8     |            |
| Age                              |    |                     | 0.0375     |
| $<$ 60                           | 65 | 27.4 $\pm$ 21.4     |            |
| $\geq$ 60                        | 67 | 20.7 $\pm$ 14.2     |            |
| <b>Metastatic tumors</b>         |    |                     |            |
| Location                         | n  | LC3B mean $\pm$ std | p = 0.4092 |
| Lymph Node                       | 86 | 38.6 $\pm$ 36.9     |            |
| Skin                             | 43 | 30.6 $\pm$ 24.8     |            |
| Distant                          | 32 | 33.4 $\pm$ 31.4     |            |

**Table S5:** Multitumor array YTMA96--Mitotic figures vs LC3B staining intensity.

|                          | LC3B expression |       | p-value   |
|--------------------------|-----------------|-------|-----------|
|                          | 0/1+            | 2+/3+ |           |
| Mitotic figures observed | 2               | 89    | p < 0.002 |
| Mitotic figures expected | 15              | 76    |           |

Mitotic figures were counted in two slides of multitumor array YTMA96 stained for LC3B. The expected number of mitotic figures was based on a random distribution between LC3B low- and high-staining tumors comprising 16% and 84% of the total respectively (Table S5). The p-value was calculated through Pearson's chi-squared test with Yates' continuity correction.

Lazova et al. CCR revision-1  
Punctate LC3B..

Figs 1-6

Supplemental Fig S1

Fig S1

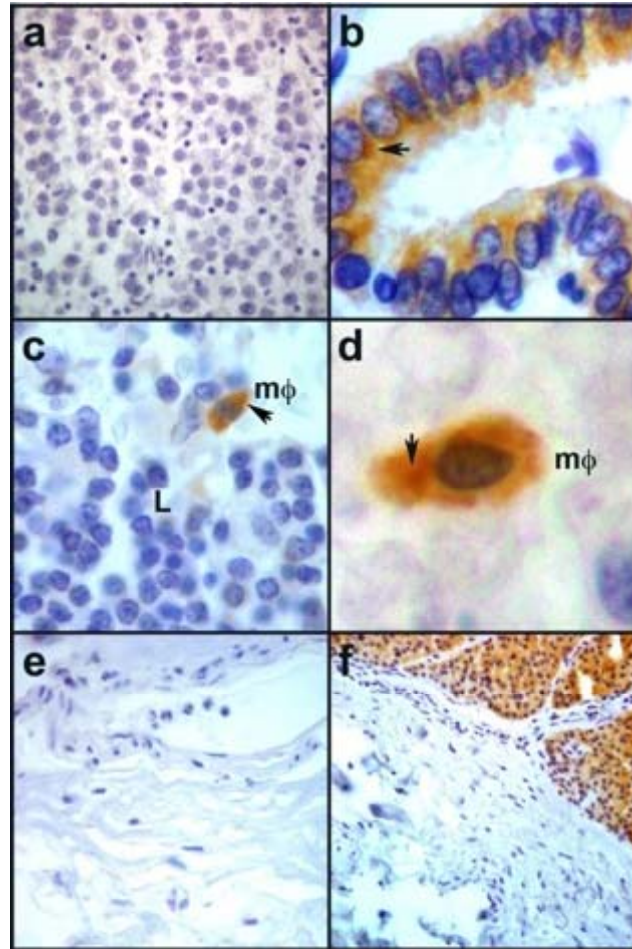

Supplement: NIHMS640923-supplement-supplement_1.pdf [file NIHMS640923-supplement-supplement_1.pdf]
